# Supplementary material
Source: MDPI journal article supplement (https://www.mdpi.com/2073-4433/14/9/1395)
Supplement: s1 [file s1 › atmosphere-2534997-supplementary.pdf]

## Supplementary Materials:

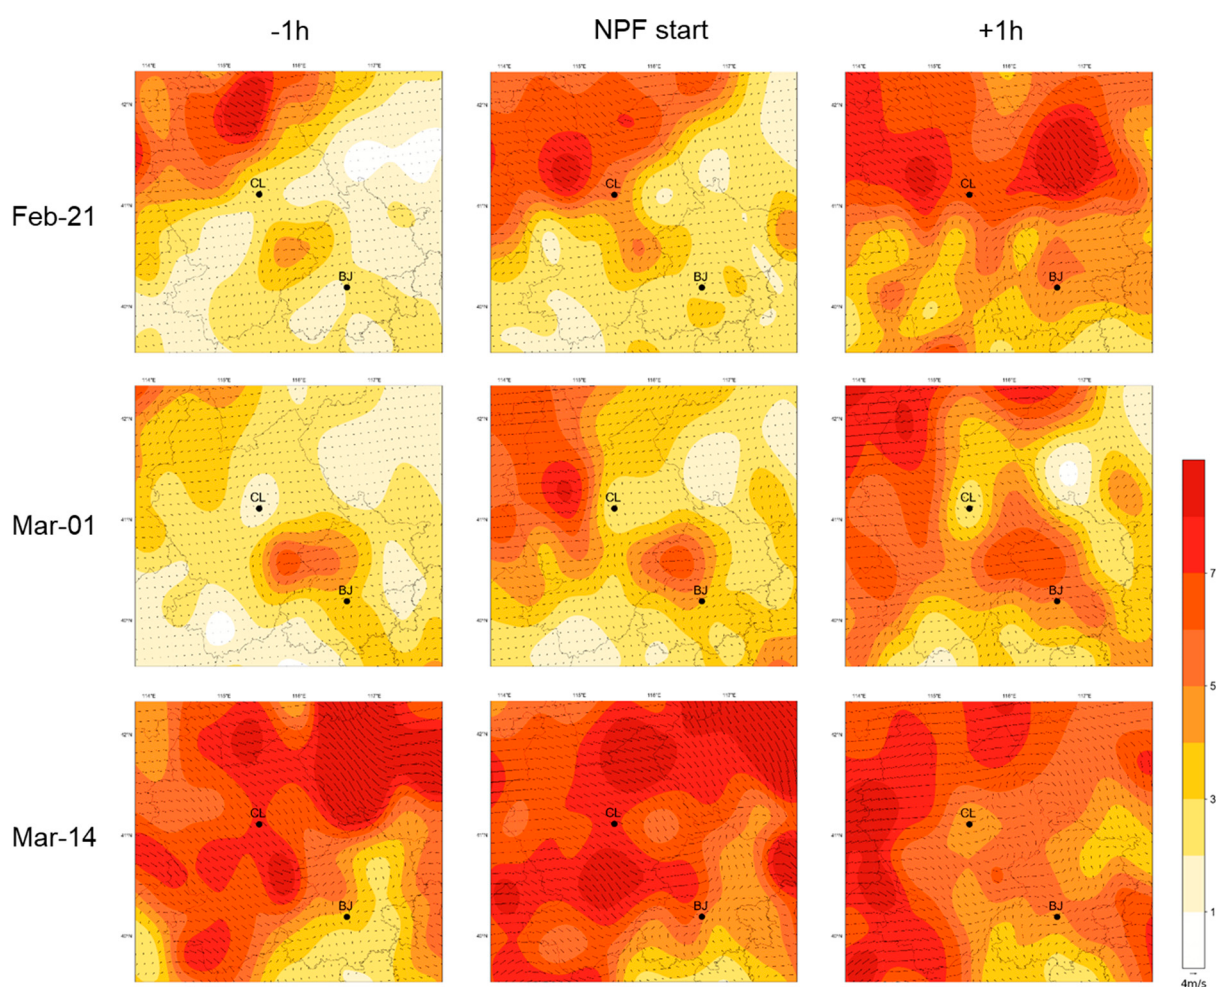

**Figure S1.** Near-surface wind distribution at NPF start time, -1h and +1h during three NPF days around BJ and CL sites (based on meteorological observation data). The points on the figures represent BJ and CL stations, respectively. The color of the legend represents the wind speed.
